# Supplementary material
Source: PubMed Central journal article supplement (PMC5766418)
Supplement: NIHMS921604-supplement-7.pdf [file NIHMS921604-supplement-7.pdf]

**TABLE S2. CHIP-QPCR PRIMERS USED IN THE STUDY. RELATED TO STAR METHODS SECTION**

| <b>PRIMER</b> | <b>FORWARD</b>       | <b>REVERSE</b>       |
|---------------|----------------------|----------------------|
| UCP1 PEAK1    | GCAACCCTCTCCCATCAGTG | GCCTAACACCGTGCTTCTCA |
| UCP1 PEAK2    | CTTTCGATATTCCCGCCTTT | ACTCAATGTCACCCCTCCTG |
| UCP1 PEAK3    | TGCAACCCTCACCTTTTAC  | CTCCTTCCATCATCCCTTCA |
