# Supplementary material
Source: PubMed Central journal article supplement (PMC5766418)

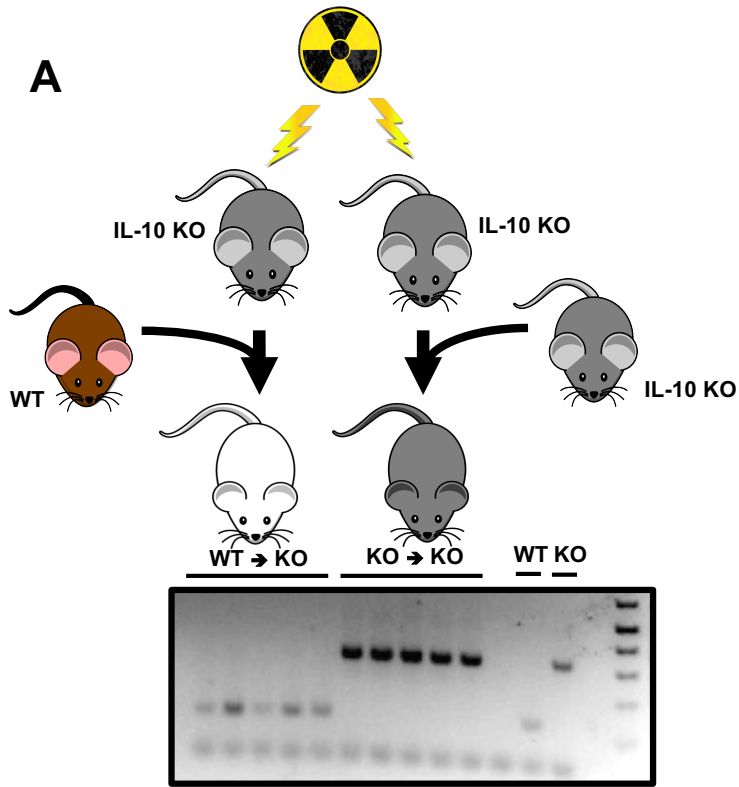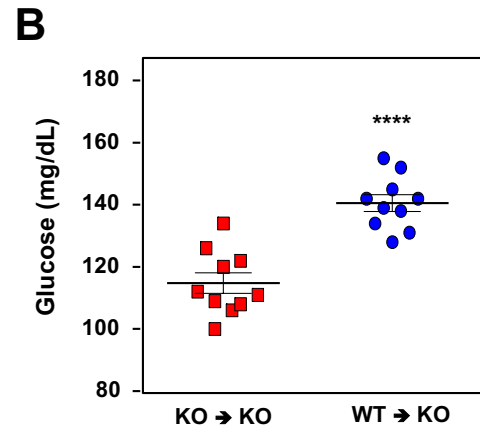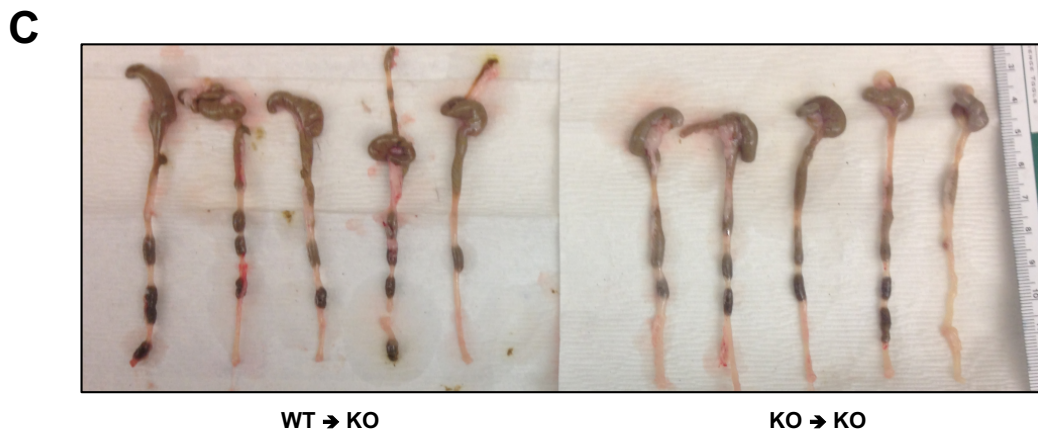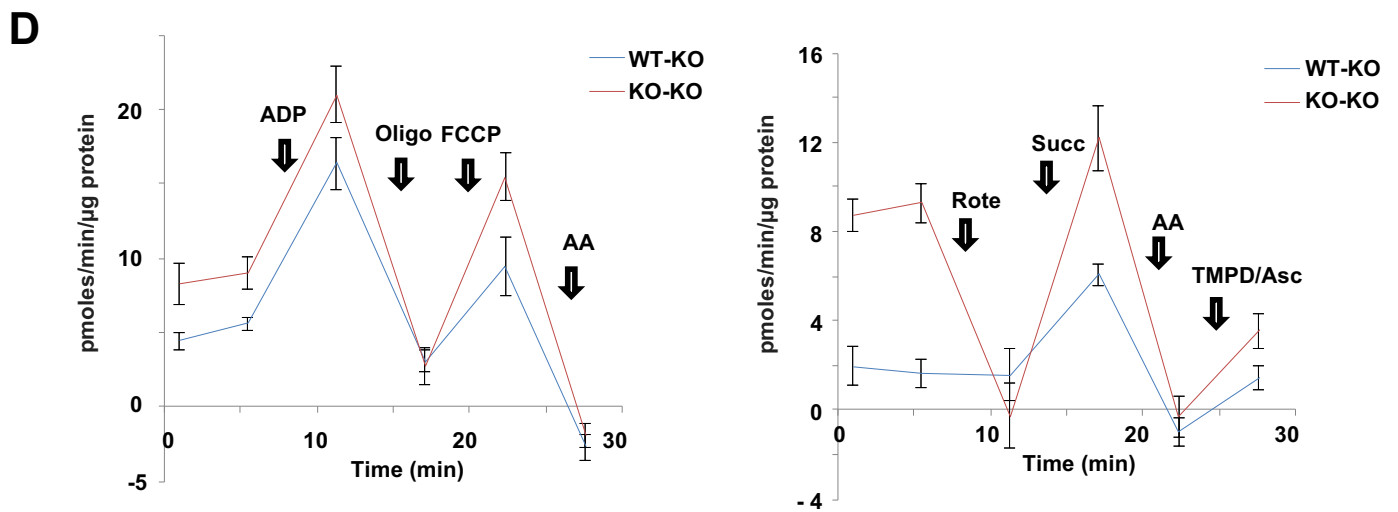

Fig.S3, related to Fig. 3

Supplement: NIHMS921604-supplement-1.pdf [file NIHMS921604-supplement-1.pdf]

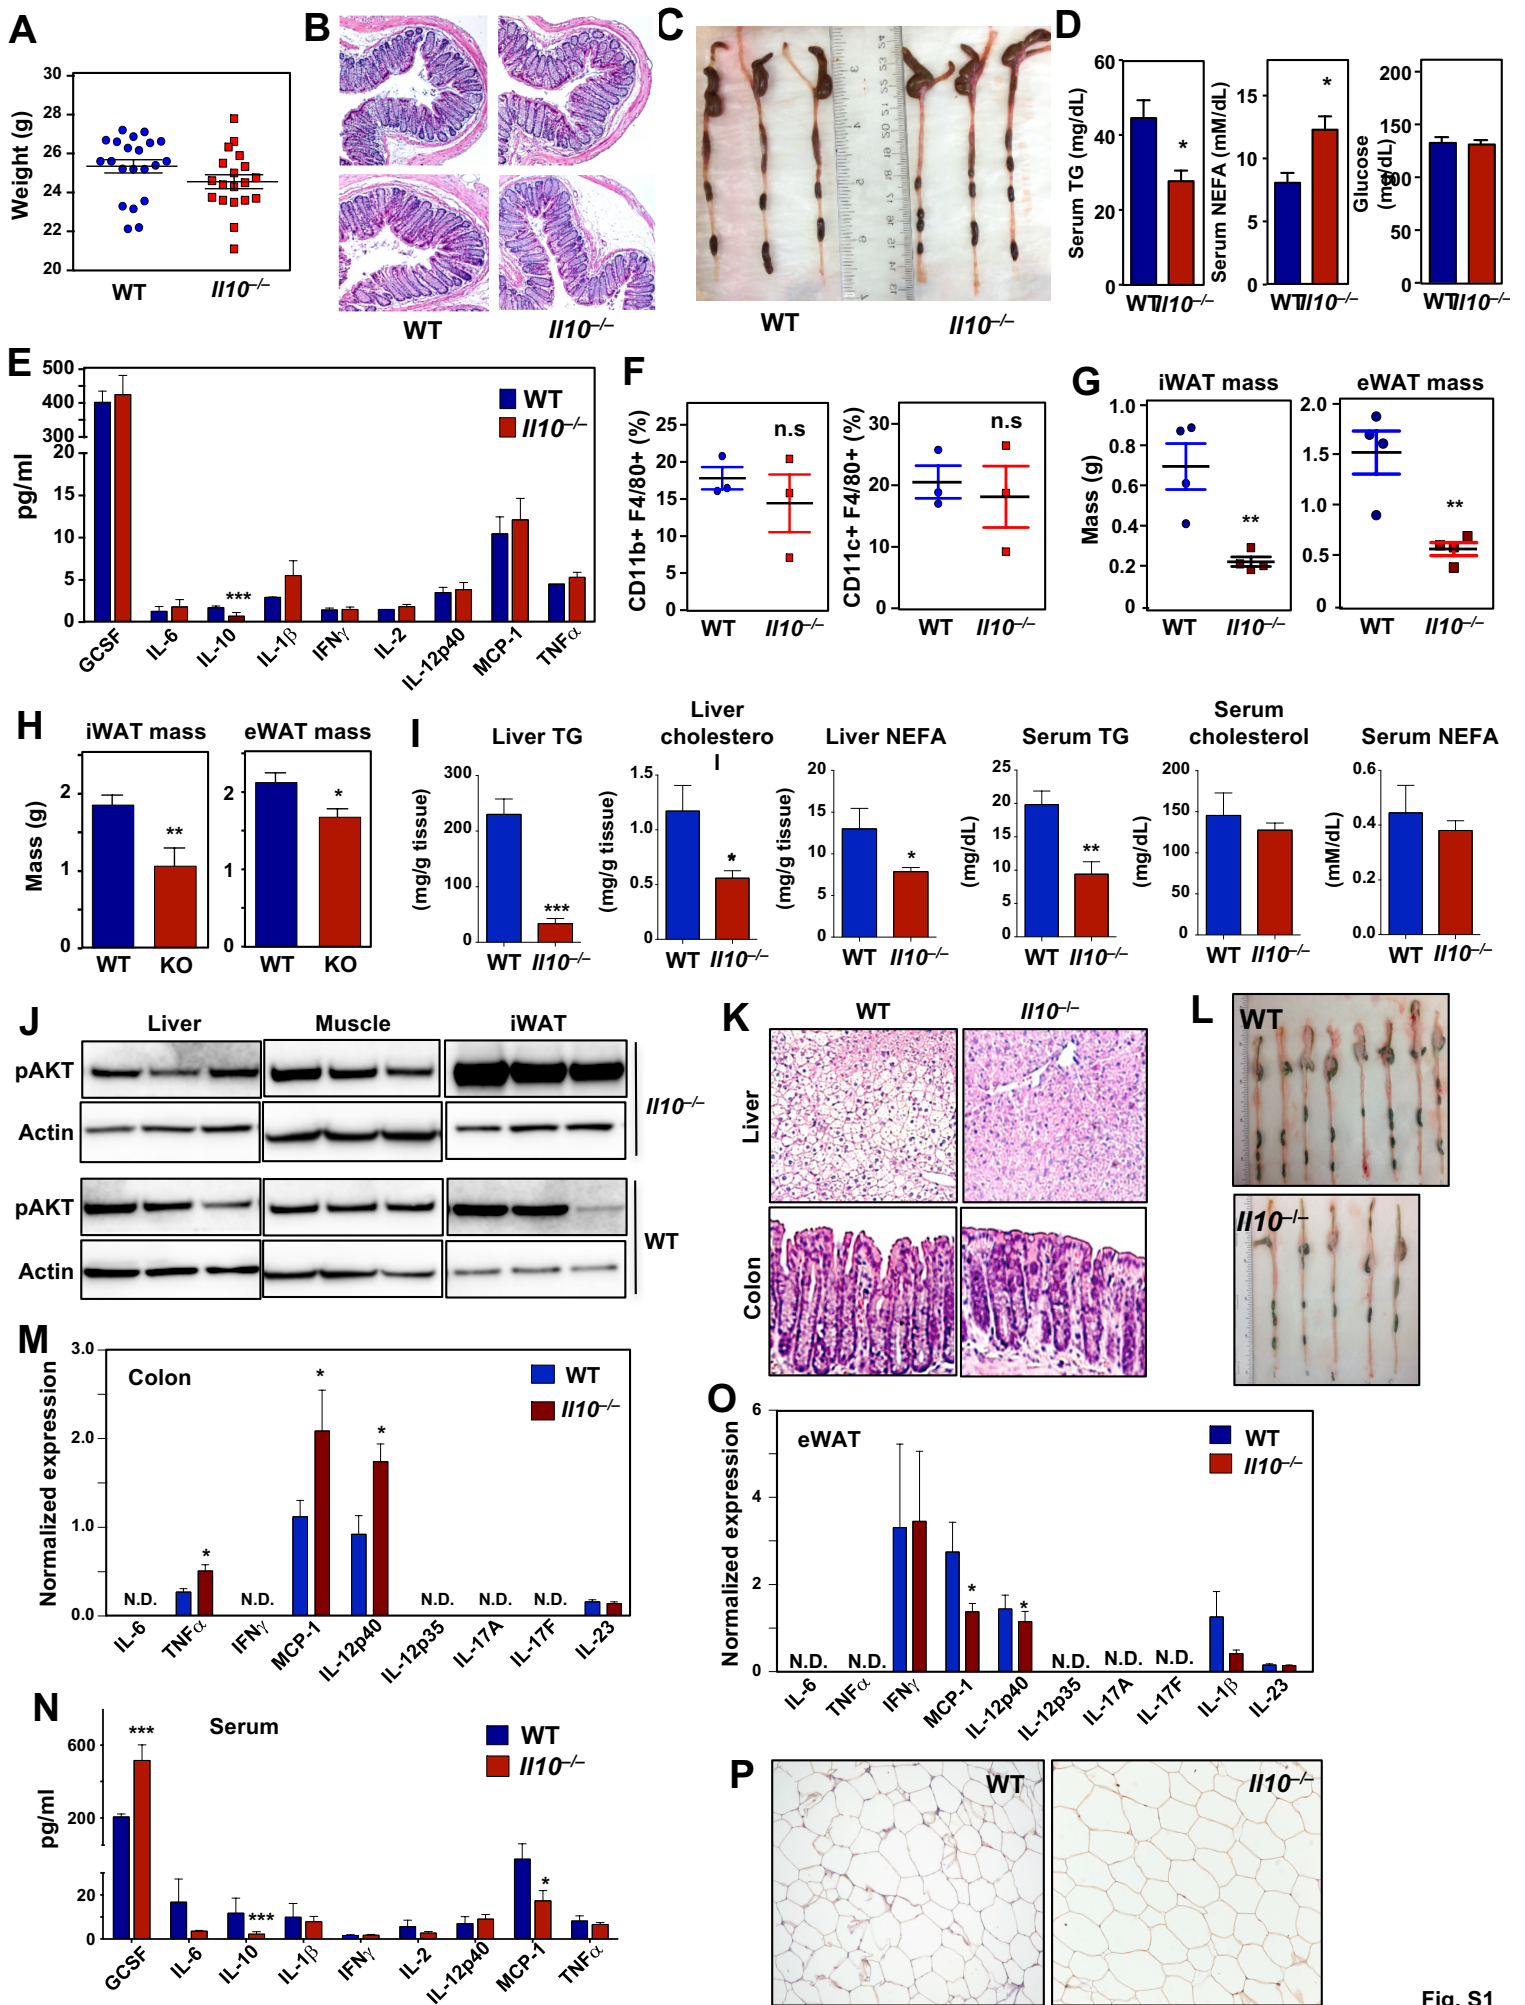

Fig. S1

Supplement: NIHMS921604-supplement-2.pdf [file NIHMS921604-supplement-2.pdf]

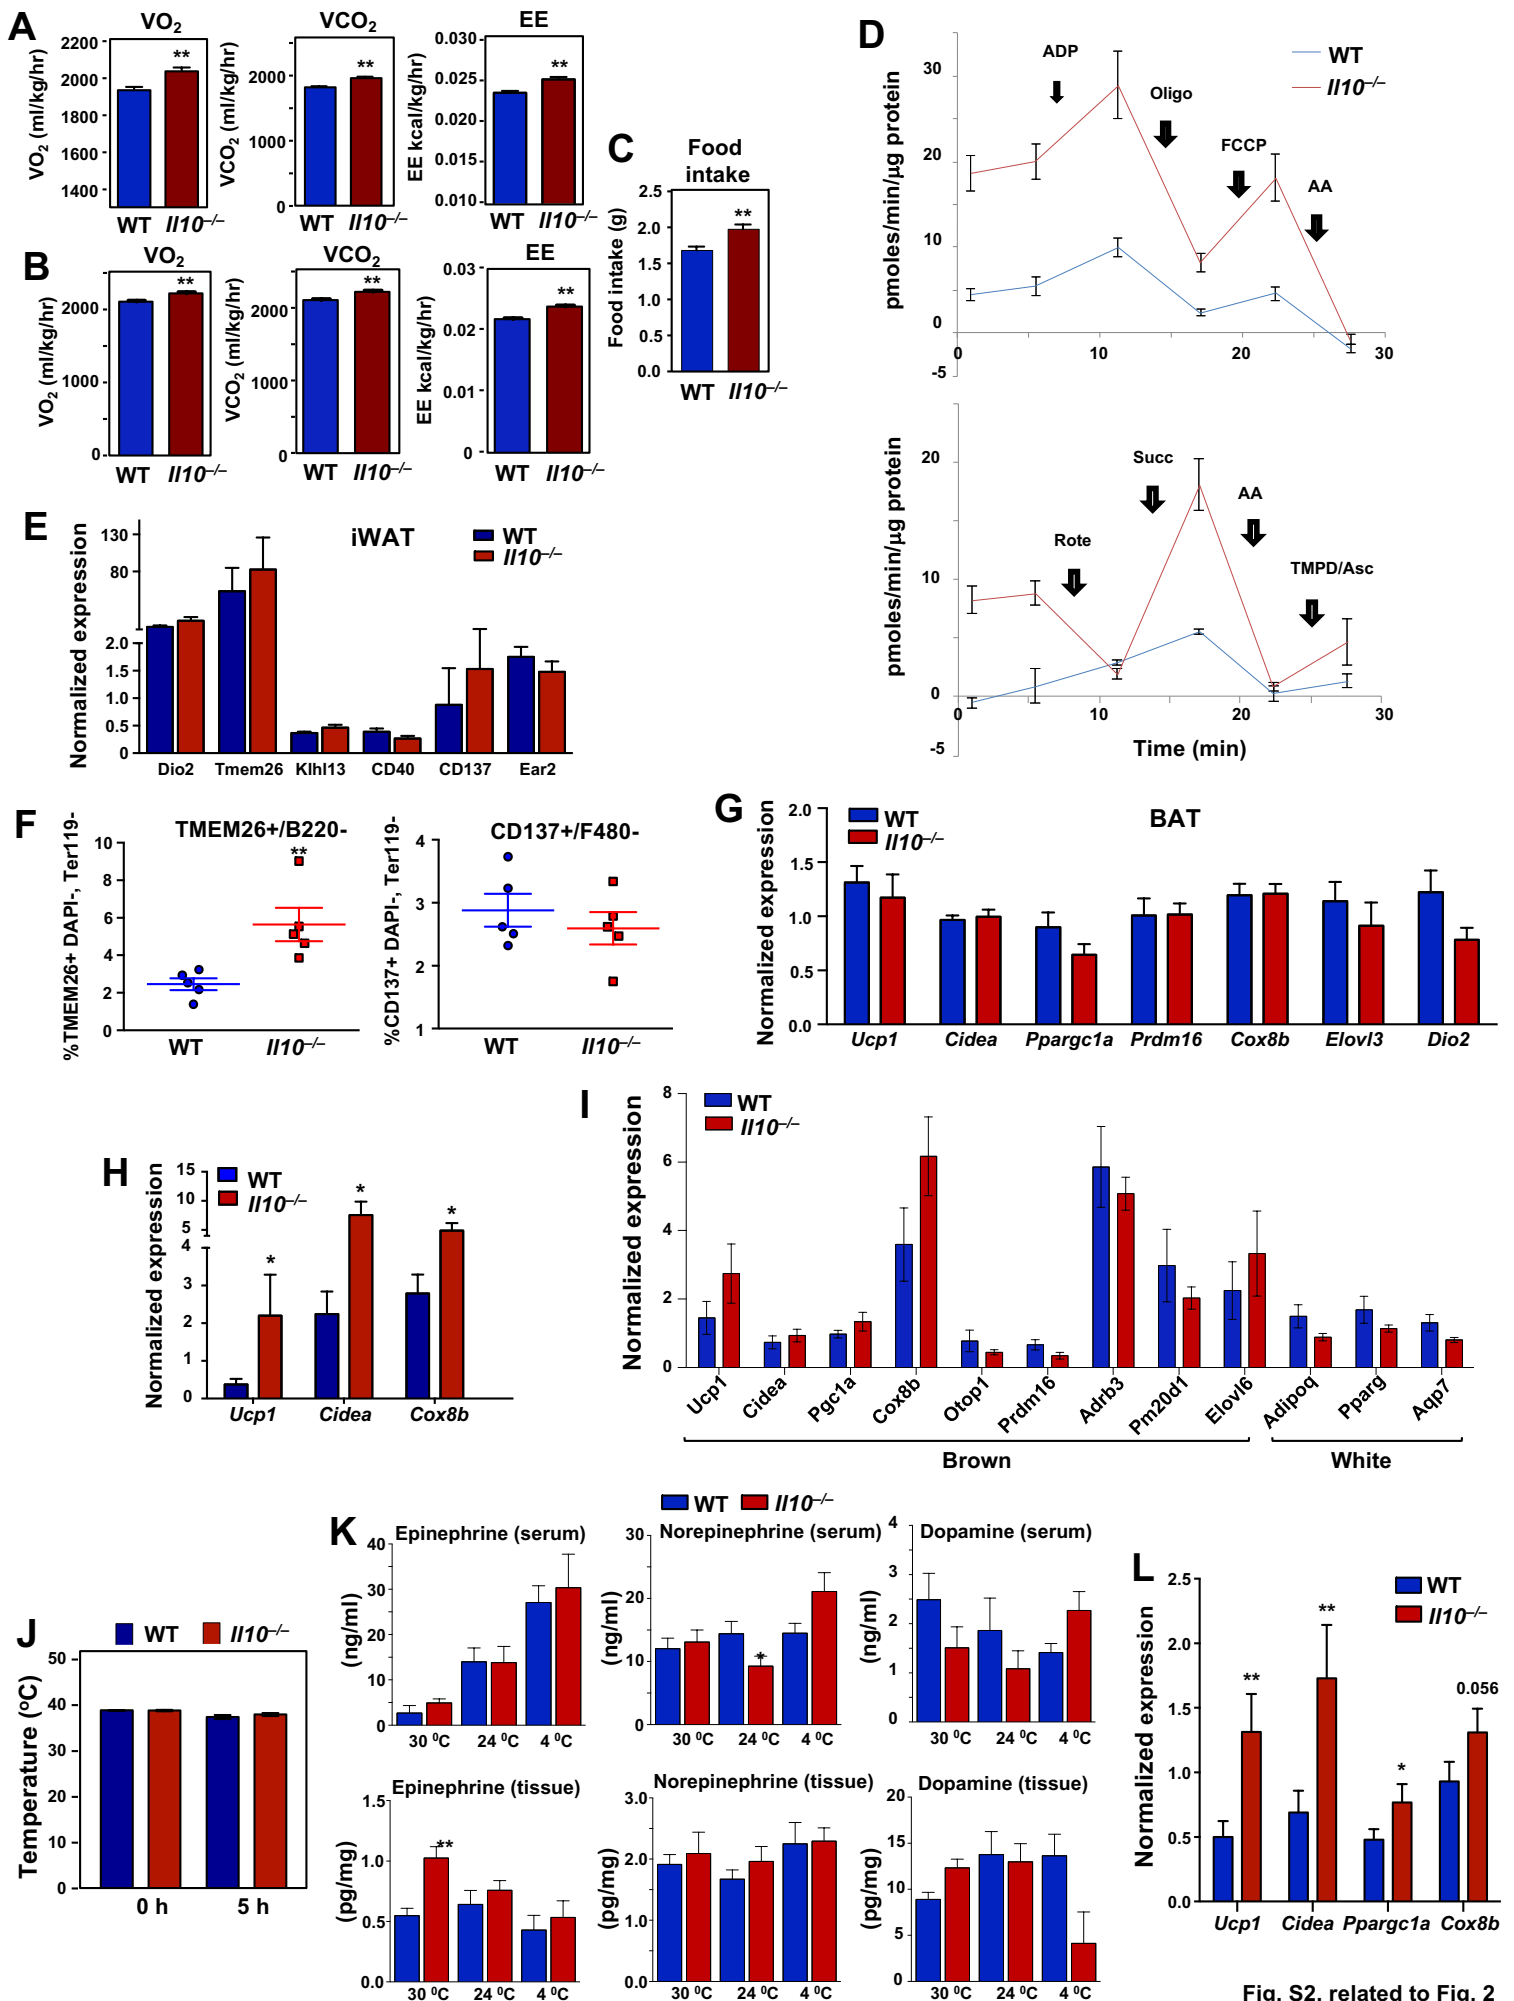

Fig. S2, related to Fig. 2

Supplement: NIHMS921604-supplement-3.pdf [file NIHMS921604-supplement-3.pdf]

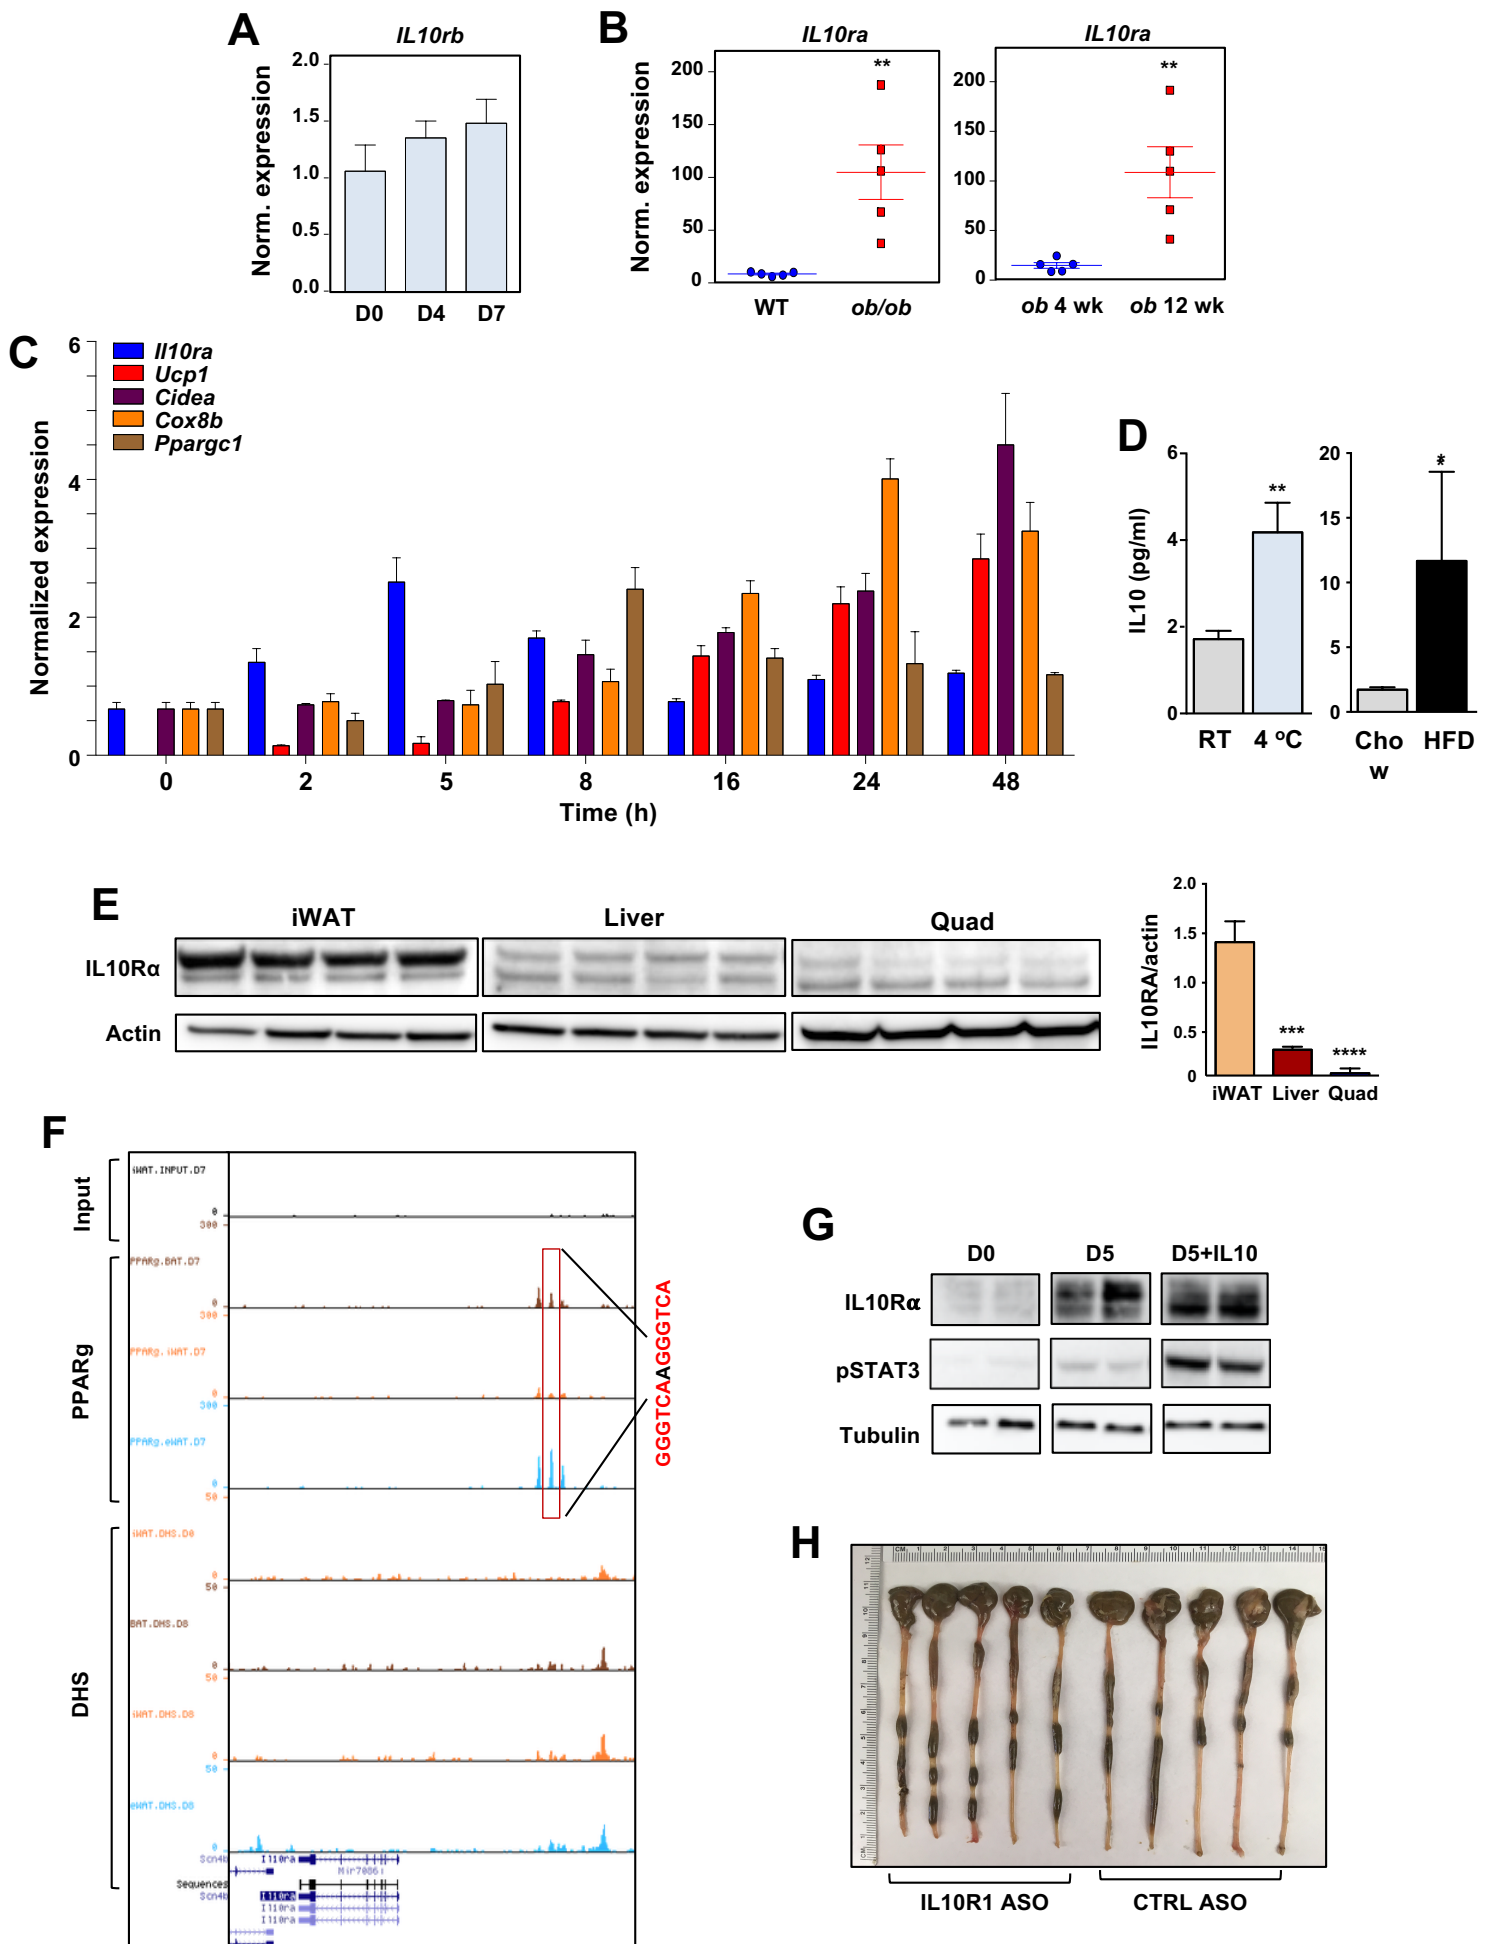

Supplement: NIHMS921604-supplement-4.pdf [file NIHMS921604-supplement-4.pdf]

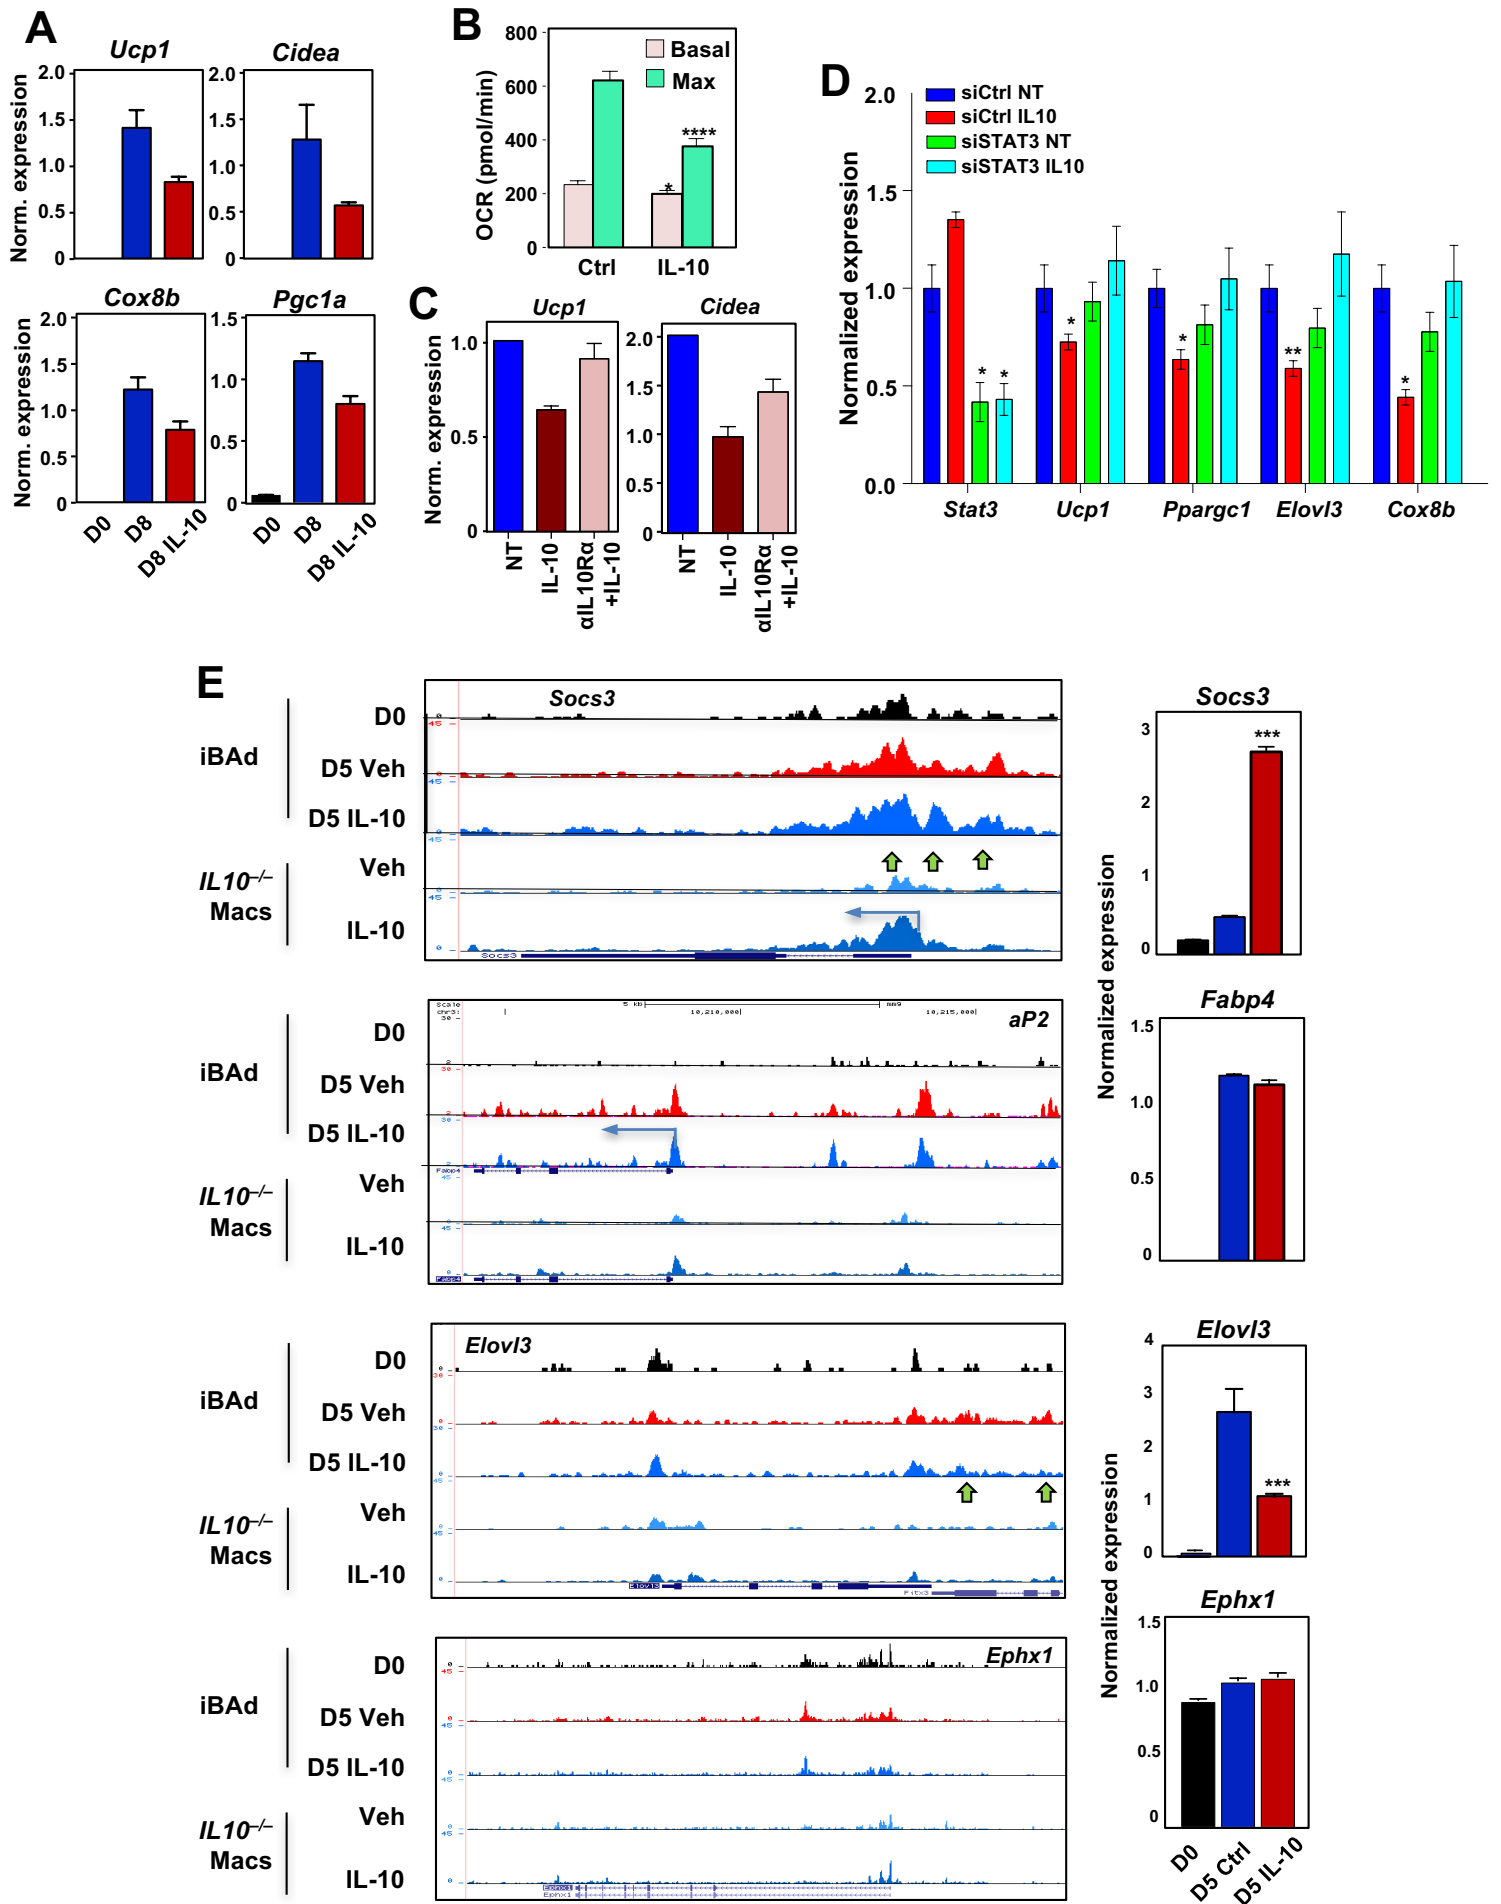

Fig. S5, related to Fig. 5

Supplement: NIHMS921604-supplement-5.pdf [file NIHMS921604-supplement-5.pdf]

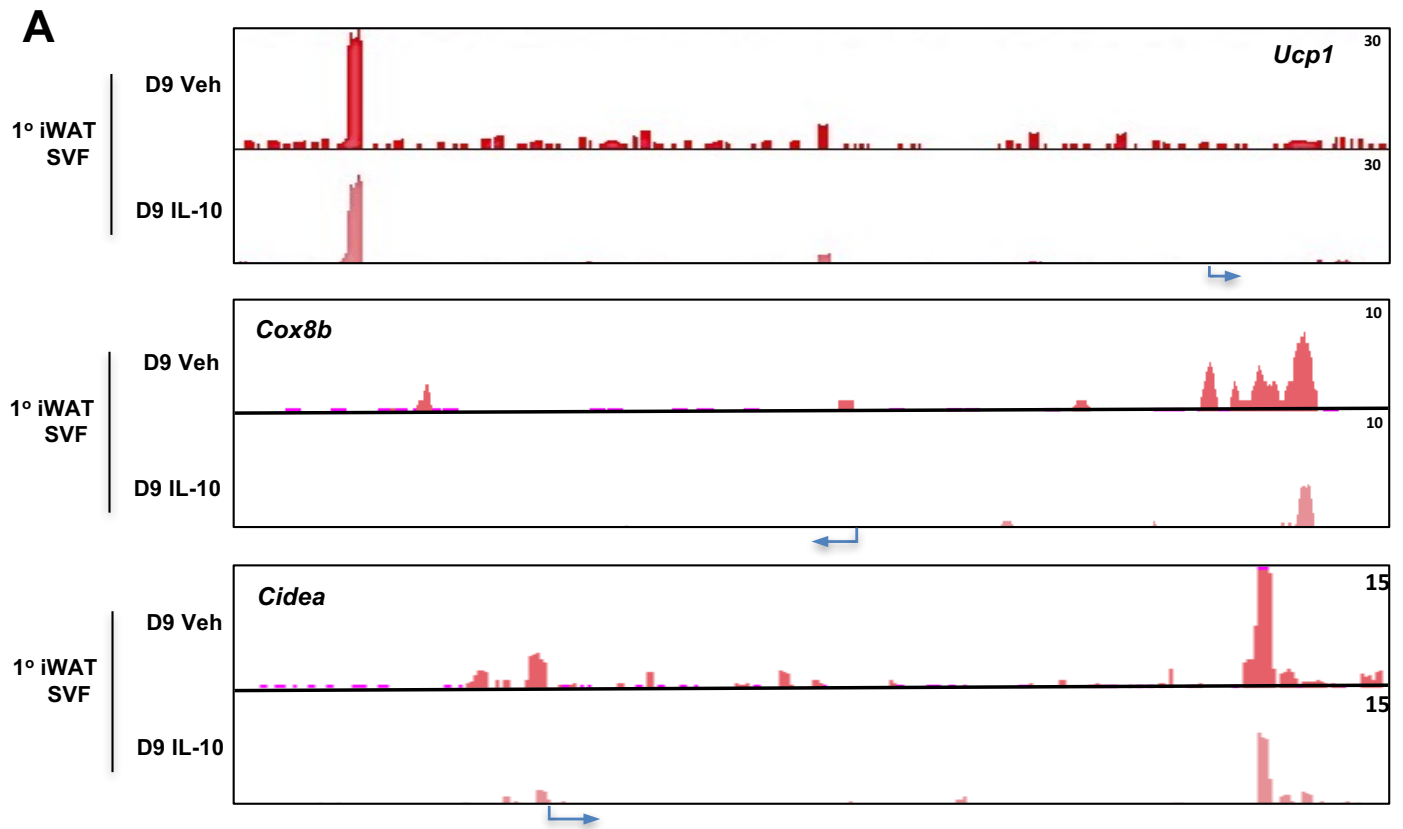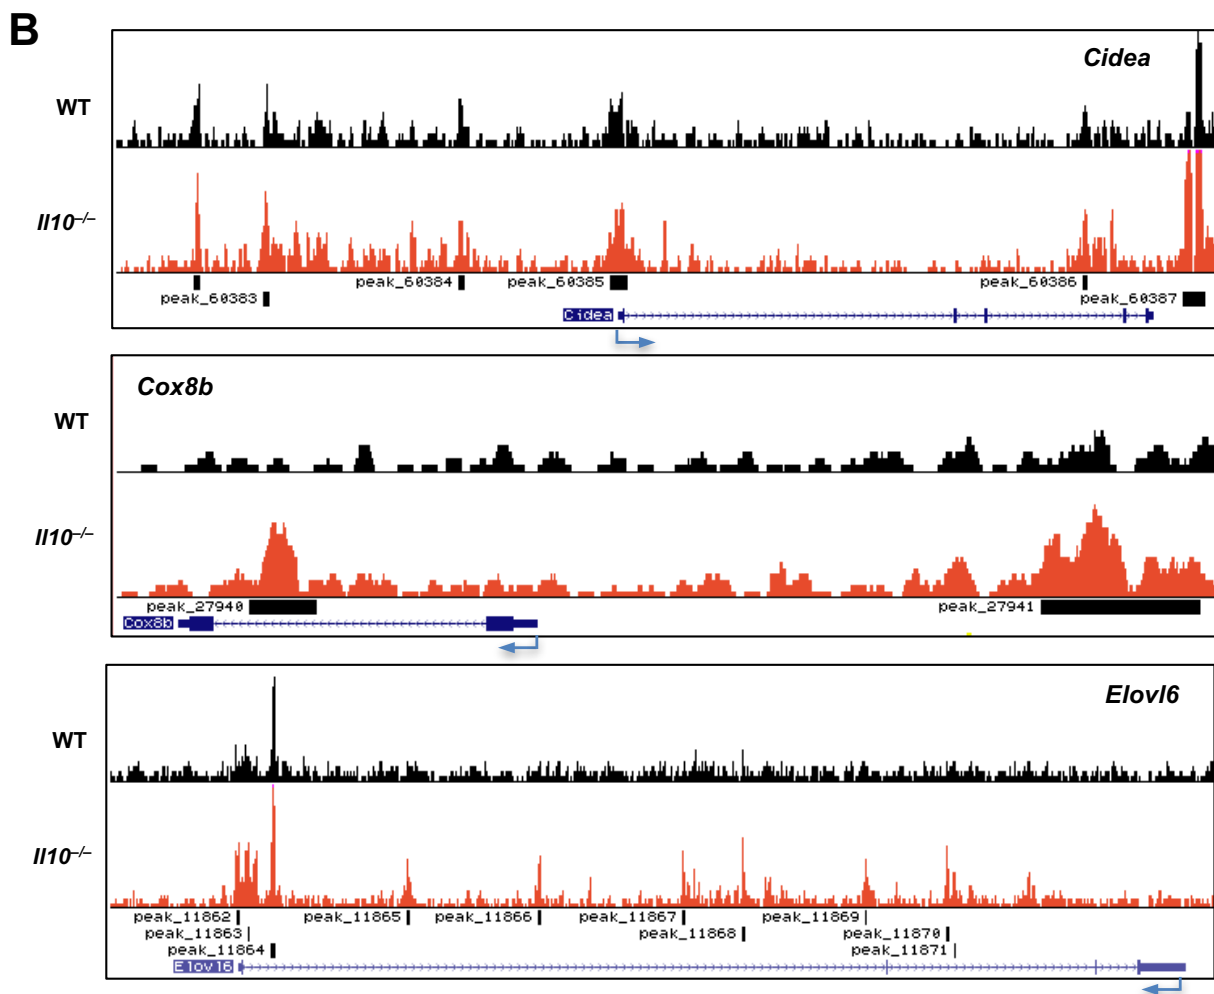

Fig. S6, related to Fig. 6

Supplement: NIHMS921604-supplement-8.pdf [file NIHMS921604-supplement-8.pdf]

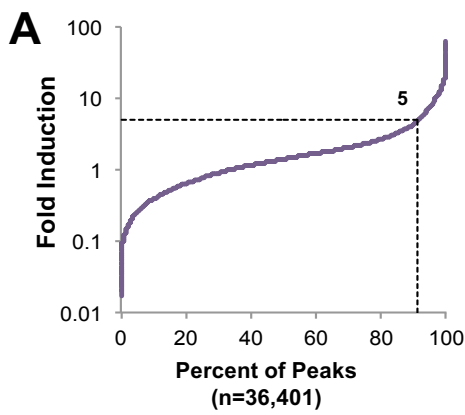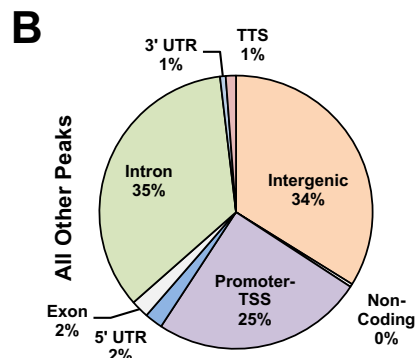

**C**

|              | All Others | Mature |
|--------------|------------|--------|
|              | 32762      | 3639   |
| Intergenic   | 34.6       | 41.2   |
| Non-Coding   | 0.3        | 0.2    |
| Promoter-TSS | 23.4       | 8.6    |
| 5' UTR       | 2.0        | 0.6    |
| Exon         | 2.1        | 1.8    |
| Intron       | 35.7       | 45.7   |
| 3' UTR       | 0.7        | 0.7    |
| TTS          | 1.2        | 1.2    |

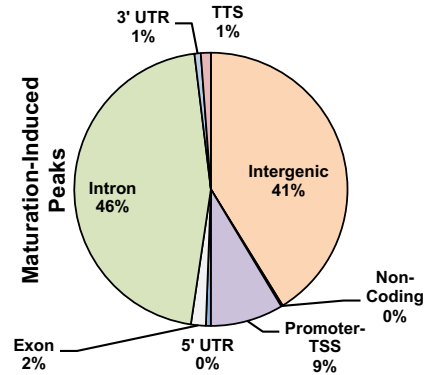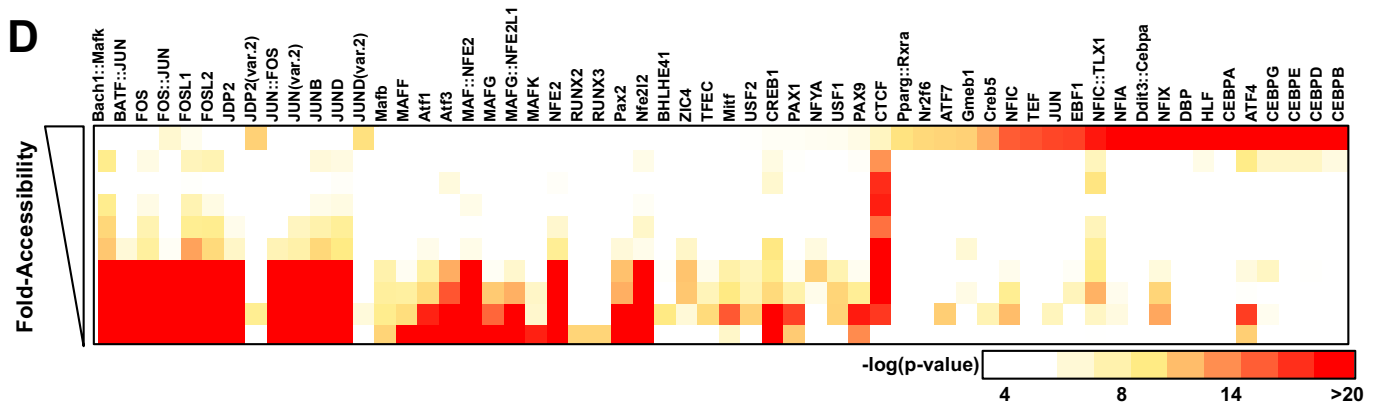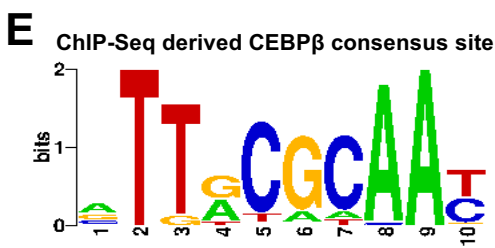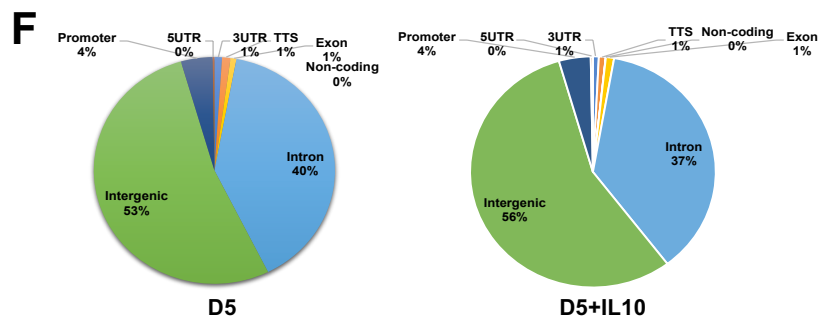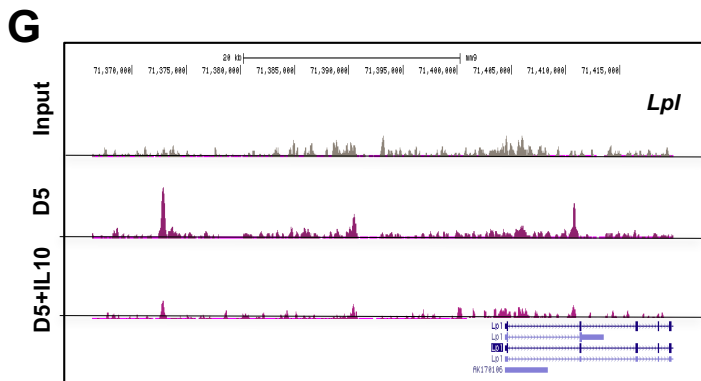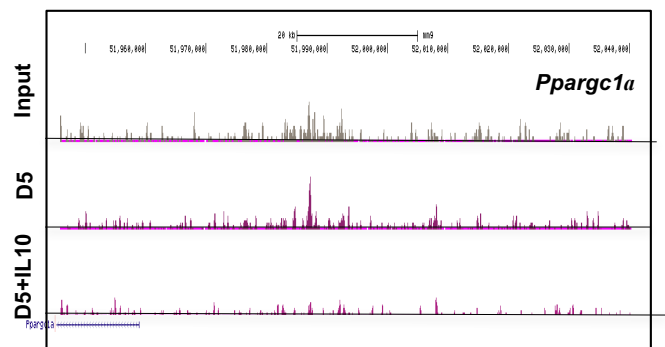

Fig. S7

Supplement: NIHMS921604-supplement-9.pdf [file NIHMS921604-supplement-9.pdf]
